# Supplementary material
Source: publisher figshare collection journal article supplement (https://gsajournals.figshare.com/ndownloader/files/14964704)
Supplement: Supplementary file 1 [file 14964704]

**Table S2** Number of PACs identified with different random samples of polyadenylated reads.

| **Polyadenylated reads (in millions)** | **Number of cleavage sites** | **Number of Poly(A) Clusters (PAC)** |
| --- | --- | --- |
| 20 | 542,155 | 92,683 |
| 19 | 525,827 | 90,496 |
| 18 | 508,830 | 88,104 |
| 17 | 491,372 | 85,700 |
| 16 | 473,264 | 83,315 |
| 15 | 454,810 | 80,728 |
| 14 | 436,048 | 78,412 |
| 13 | 415,931 | 75,770 |
